# Supplementary material for: Spiky Nickel Electrodes for Electrochemical Oxygen Evolution Catalysis by Femtosecond Laser Structuring
Source: Hindawi journal article supplement (doi:10.1155/2018/9875438), 2018-11-19

# Spiky Nickel Electrodes

## for Electrochemical Oxygen Evolution Catalysis

### by Femtosecond Laser Structuring

*Felix Rieck genannt Best<sup>a</sup>, Jürgen Koch<sup>b</sup>, Gerhard Lilienkamp<sup>c</sup>, Franz Körkemeyer<sup>d</sup>, Hans Jürgen Maier<sup>d</sup>, Jürgen Caro<sup>a</sup> and Karsten Lange<sup>a\*</sup>*

\* Corresponding author. Tel.: +49 511 762-2942; fax: +49-511-762-19121; E-mail address: karsten.lange@pci.uni-hannover.de

<sup>a</sup> Institute of Physical Chemistry and Electrochemistry, Leibniz Universität Hannover, Callinstr. 3A, D-30167 Hannover, Germany

<sup>b</sup> Laser Zentrum Hannover e.V., Hollerithallee 8, D-30419 Hannover, Germany

<sup>c</sup> Institute of Energy Research and Physical Technologies, TU Clausthal, Leibnizstr. 4, D-38678 Clausthal-Zellerfeld, Germany

<sup>d</sup> Institut für Werkstoffkunde (Material Science), Leibniz Universität Hannover, An der Universität 2, D-30823 Garbsen, Germany

#### SUPPLEMENTARY INFORMATION

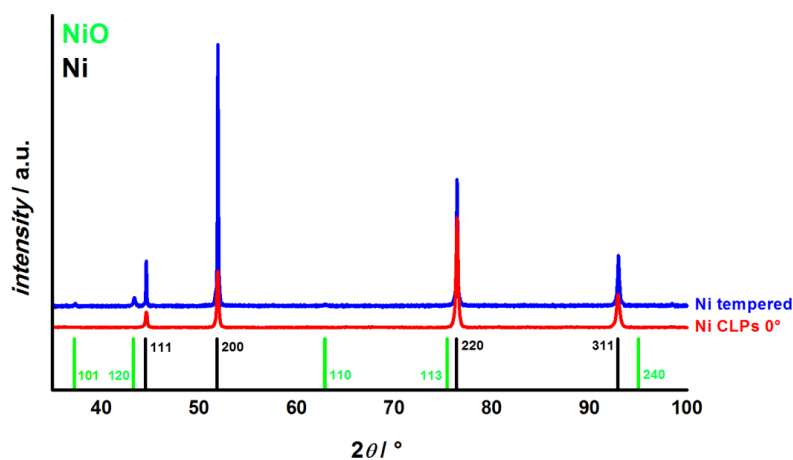

**Fig. 1.** X-ray diffraction patterns of laser structured Ni electrodes and tempered comparative sample of the region  $30^\circ < 2\theta < 100^\circ$ . Theoretical reflex position of Ni and NiO is shown with corresponding MILLER indices.

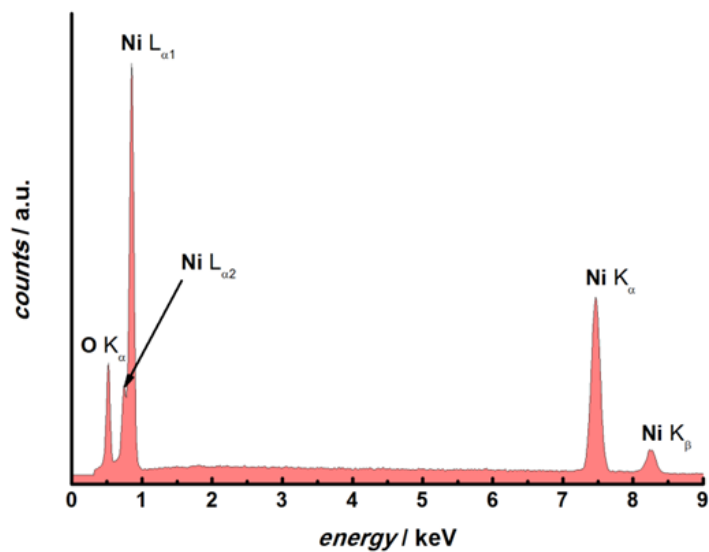

**Fig. 2.** Energy-dispersive X-ray spectrum of a laser structured Ni electrode.

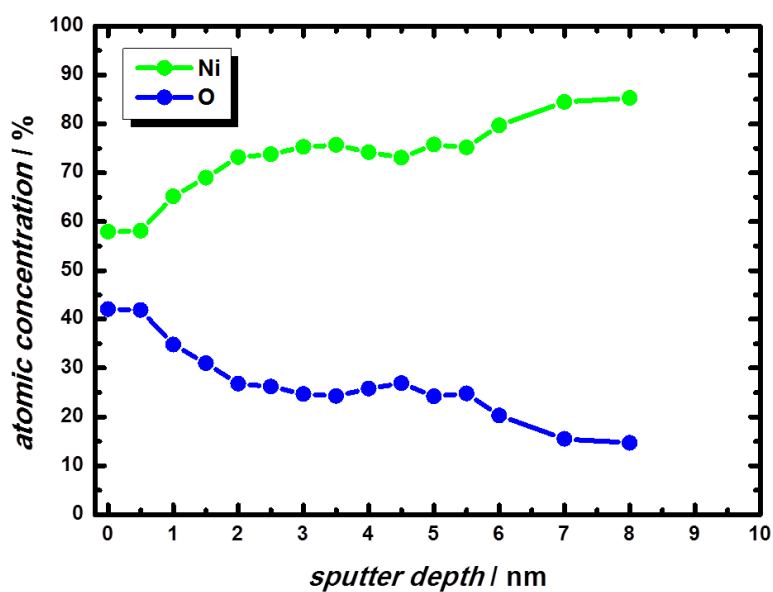

**Fig. 3:** Depth profile of Ni CLPs 0° with nickel oxide layer thickness of  $\approx 4 - 7$  nm.

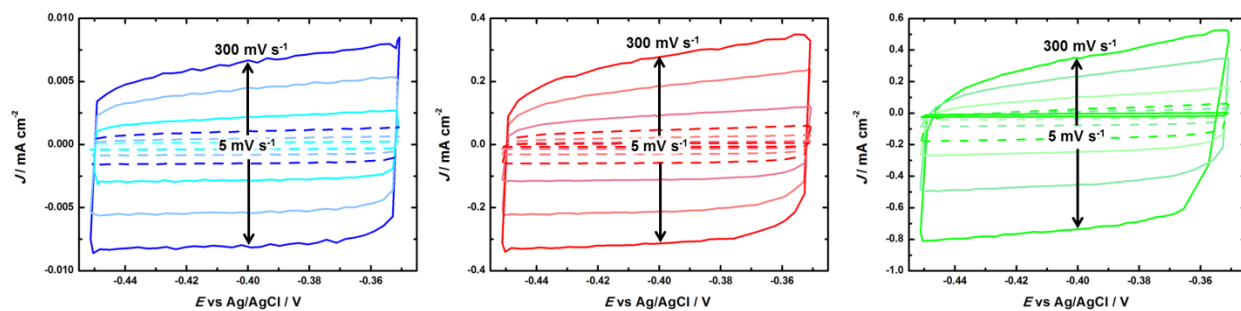

**Fig. 4.** Cyclic voltammogram cascades for Ni tempered (a), Ni CLPs  $0^\circ$  (b) and Ni CLPs  $45^\circ$  (c), measured with scan speeds between 5  $\text{mV s}^{-1}$  and 300  $\text{mV s}^{-1}$ .

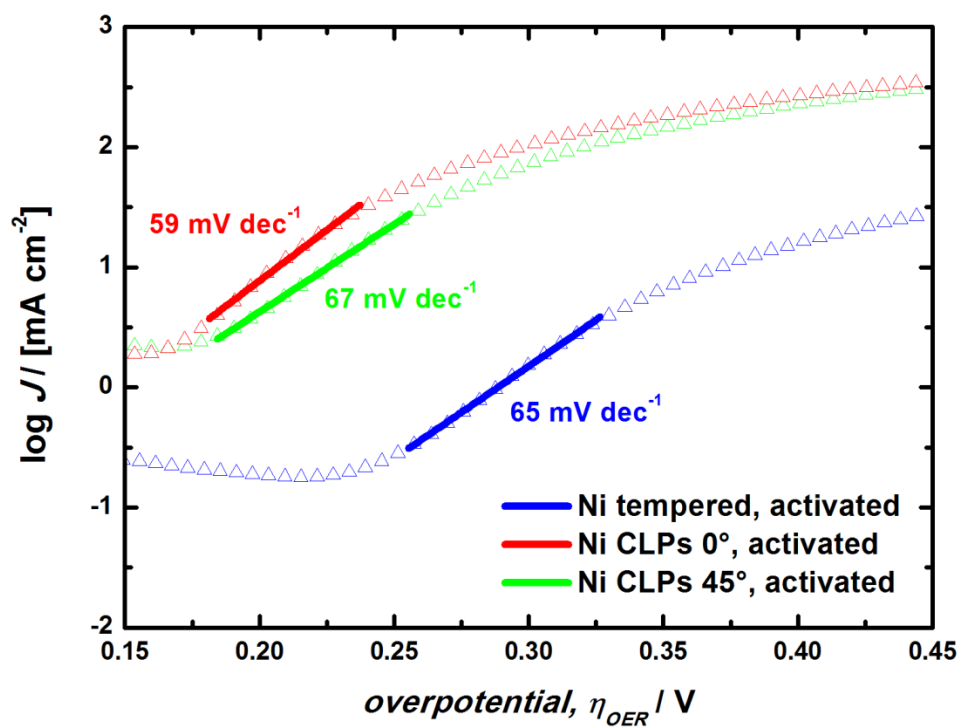

**Fig. 5.** Tafel plots obtained of laser structured and tempered Ni plates.

## GRAPHICAL ABSTRACT

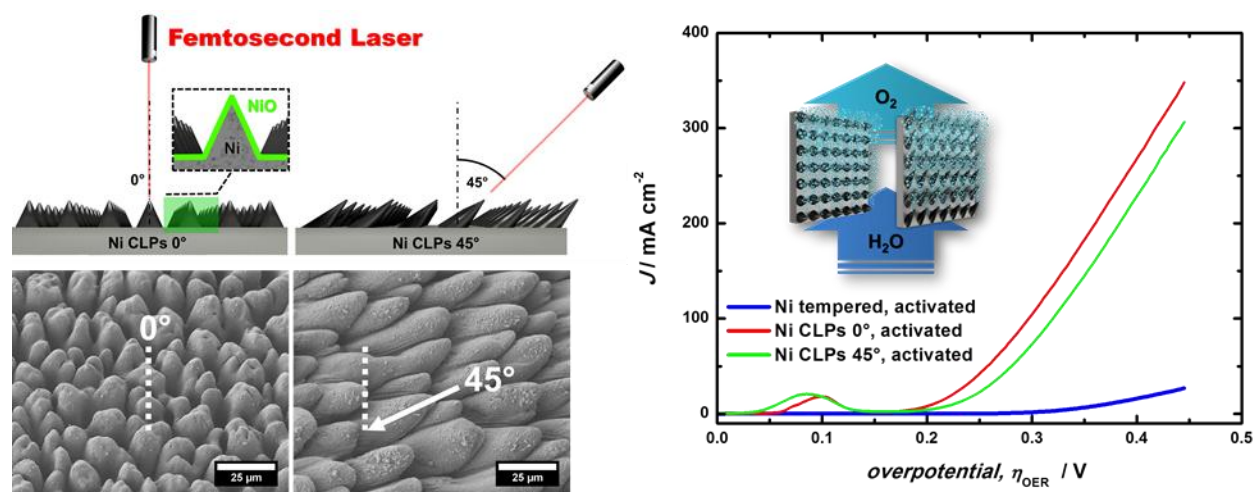

Supplement: f1 [file 9875438.f1.pdf]
